# Supplementary material for: Altered Expression of Wnt Signaling Pathway Components in Osteogenesis of Mesenchymal Stem Cells in Osteoarthritis Patients
Source: PubMed Central journal article supplement (PMC4564164; doi:10.1371/journal.pone.0137170), 2015-09-09

**Supporting information Image S5.**  
**Diagram of the human Wnt pathway**

Diagram based on the human Wnt pathway modified from the KEGG (Kyoto encyclopedia of Genes and Genomes) map 04310. Genes analyzed and present in our array are indicated inside green text boxes.

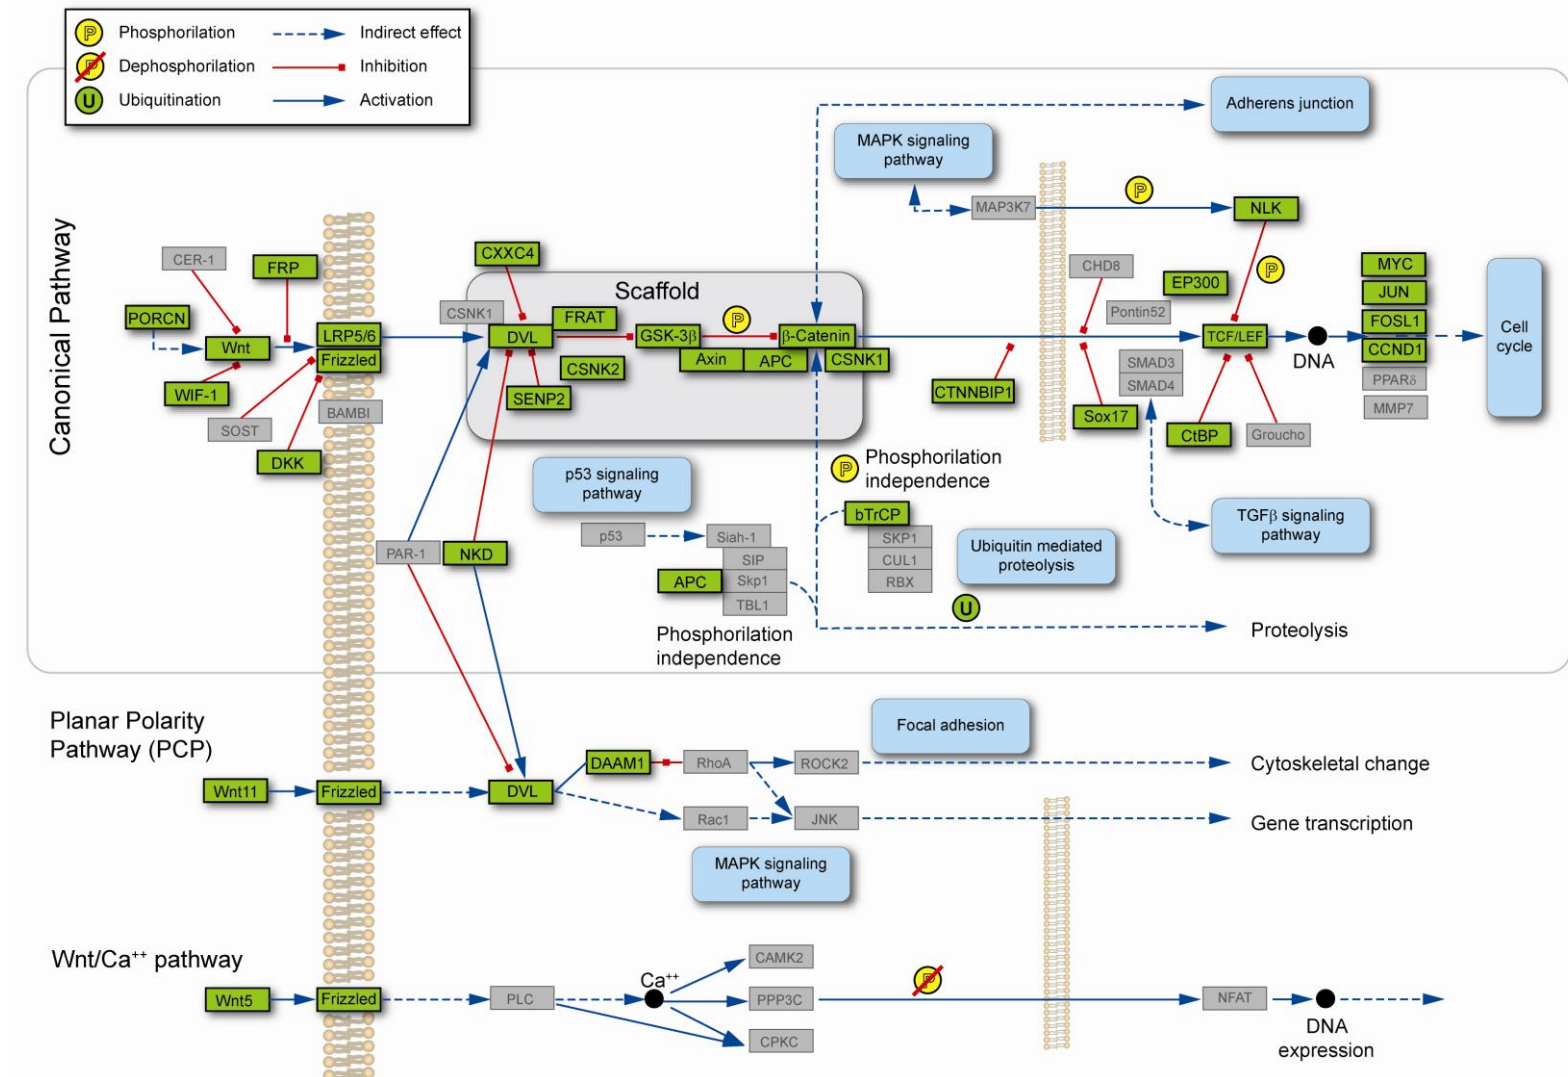

Supplement: pone.0137170.s001.pdf [file pone.0137170.s001.pdf]
