# Supplementary material for: Altered Expression of Wnt Signaling Pathway Components in Osteogenesis of Mesenchymal Stem Cells in Osteoarthritis Patients
Source: PubMed Central journal article supplement (PMC4564164; doi:10.1371/journal.pone.0137170), 2015-09-09

## Supporting information Image S6.

Known and predicted interactions between proteins coded by the genes downregulated in OA-MSCs

Network Display of predicted functional links using the STRING 9.05 database of known and predicted protein interactions (<http://string-db.org/>). The image represents the confidence view interactions where the stronger associations are represented by thicker lines.

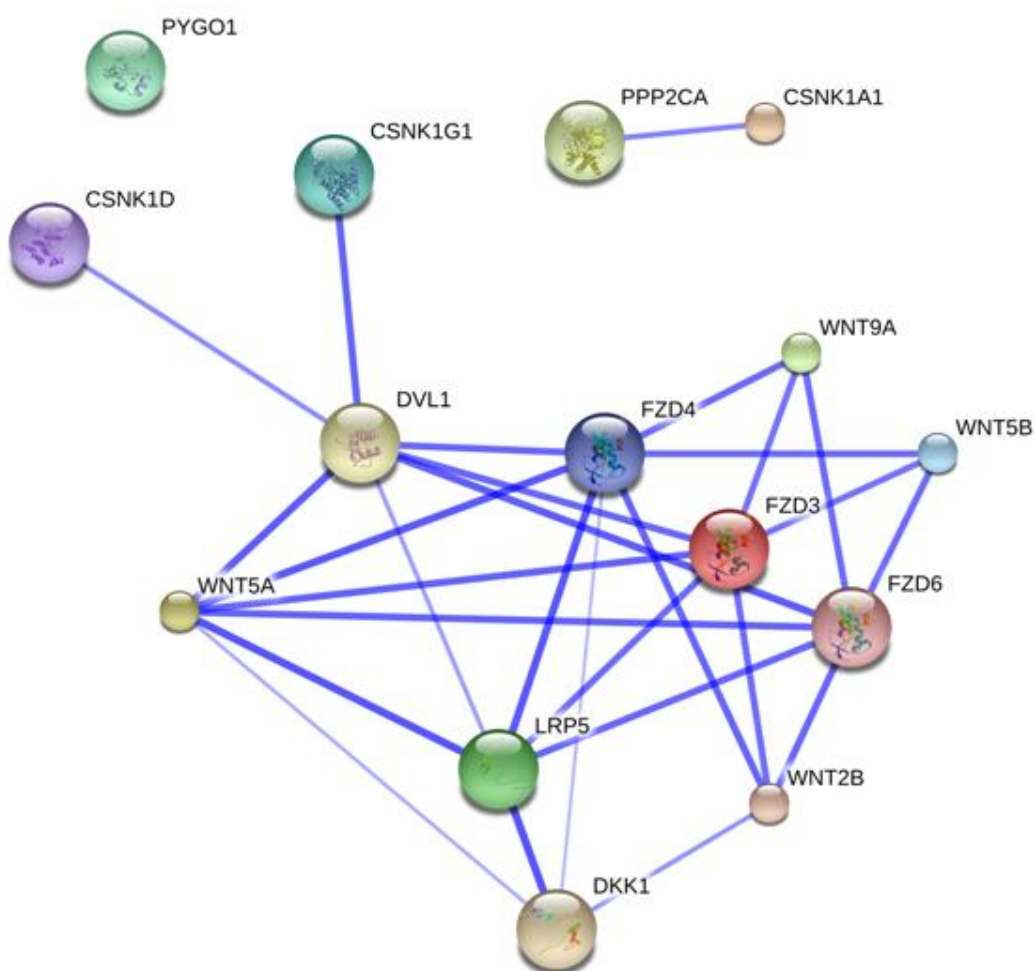

Supplement: pone.0137170.s002.pdf [file pone.0137170.s002.pdf]
