# Supplementary material for: Altered Expression of Wnt Signaling Pathway Components in Osteogenesis of Mesenchymal Stem Cells in Osteoarthritis Patients
Source: PubMed Central journal article supplement (PMC4564164; doi:10.1371/journal.pone.0137170), 2015-09-09
Supplement: pone.0137170.s005.pdf [file pone.0137170.s005.pdf]

**Supporting information Table S3.** List of the 84 genes analyzed.

| <b>Symbol</b>   | <b>Unigene</b> | <b>Refseq</b> | <b>Description</b>                                   |
|-----------------|----------------|---------------|------------------------------------------------------|
| <i>AES</i>      | Hs.515053      | NM_001130     | Amino-terminal enhancer of split                     |
| <i>APC</i>      | Hs.158932      | NM_000038     | Adenomatous polyposis coli                           |
| <i>AXIN1</i>    | Hs.592082      | NM_003502     | Axin 1                                               |
| <i>BCL9</i>     | Hs.415209      | NM_004326     | B-cell CLL/lymphoma 9                                |
| <i>BTRC</i>     | Hs.643802      | NM_033637     | Beta-transducin repeat containing                    |
| <i>FZD5</i>     | Hs.17631       | NM_003468     | Frizzled family receptor 5                           |
| <i>CCND1</i>    | Hs.523852      | NM_053056     | Cyclin D1                                            |
| <i>CCND2</i>    | Hs.376071      | NM_001759     | Cyclin D2                                            |
| <i>CCND3</i>    | Hs.534307      | NM_001760     | Cyclin D3                                            |
| <i>CSNK1A1</i>  | Hs.529862      | NM_001892     | Casein kinase 1, alpha 1                             |
| <i>CSNK1D</i>   | Hs.631725      | NM_001893     | Casein kinase 1, delta                               |
| <i>CSNK1G1</i>  | Hs.646508      | NM_022048     | Casein kinase 1, gamma 1                             |
| <i>CSNK2A1</i>  | Hs.644056      | NM_001895     | Casein kinase 2, alpha 1 polypeptide                 |
| <i>CTBP1</i>    | Hs.208597      | NM_001328     | C-terminal binding protein 1                         |
| <i>CTBP2</i>    | Hs.501345      | NM_022802     | C-terminal binding protein 2                         |
| <i>CTNNB1</i>   | Hs.476018      | NM_001904     | Catenin (cadherin-associated protein), beta 1, 88kDa |
| <i>CTNNBIP1</i> | Hs.463759      | NM_020248     | Catenin, beta interacting protein 1                  |
| <i>CXXC4</i>    | Hs.12248       | NM_025212     | CXXC finger protein 4                                |
| <i>DAAM1</i>    | Hs.654934      | NM_014992     | Dishevelled associated activator of morphogenesis 1  |
| <i>DIXDC1</i>   | Hs.655626      | NM_033425     | DIX domain containing 1                              |
| <i>DKK1</i>     | Hs.40499       | NM_012242     | Dickkopf homolog 1 ( <i>Xenopus laevis</i> )         |
| <i>DVL1</i>     | Hs.74375       | NM_004421     | Dishevelled, dsh homolog 1 ( <i>Drosophila</i> )     |
| <i>DVL2</i>     | Hs.118640      | NM_004422     | Dishevelled, dsh homolog 2 ( <i>Drosophila</i> )     |
| <i>EP300</i>    | Hs.517517      | NM_001429     | E1A binding protein p300                             |
| <i>FBXW11</i>   | Hs.484138      | NM_012300     | F-box and WD repeat domain containing 11             |
| <i>FBXW2</i>    | Hs.494985      | NM_012164     | F-box and WD repeat domain containing 2              |
| <i>FGF4</i>     | Hs.1755        | NM_002007     | Fibroblast growth factor 4                           |
| <i>FOSL1</i>    | Hs.283565      | NM_005438     | FOS-like antigen 1                                   |
| <i>FOXN1</i>    | Hs.663679      | NM_003593     | Forkhead box N1                                      |
| <i>FRAT1</i>    | Hs.126057      | NM_005479     | Frequently rearranged in advanced T-cell lymphomas   |
| <i>FRZB</i>     | Hs.128453      | NM_001463     | Frizzled-related protein                             |
| <i>FSHB</i>     | Hs.36975       | NM_000510     | Follicle stimulating hormone, beta polypeptide       |
| <i>FZD1</i>     | Hs.94234       | NM_003505     | Frizzled family receptor 1                           |
| <i>FZD2</i>     | Hs.142912      | NM_001466     | Frizzled family receptor 2                           |
| <i>FZD3</i>     | Hs.40735       | NM_017412     | Frizzled family receptor 3                           |
| <i>FZD4</i>     | Hs.19545       | NM_012193     | Frizzled family receptor 4                           |
| <i>FZD6</i>     | Hs.591863      | NM_003506     | Frizzled family receptor 6                           |
| <i>FZD7</i>     | Hs.173859      | NM_003507     | Frizzled family receptor 7                           |
| <i>FZD8</i>     | Hs.302634      | NM_031866     | Frizzled family receptor 8                           |
| <i>GSK3A</i>    | Hs.466828      | NM_019884     | Glycogen synthase kinase 3 alpha                     |
| <i>GSK3B</i>    | Hs.445733      | NM_002093     | Glycogen synthase kinase 3 beta                      |

| <b>Symbol</b>   | <b>Unigene</b>   | <b>Refseq</b>    | <b>Description</b>                                       |
|-----------------|------------------|------------------|----------------------------------------------------------|
| <i>JUN</i>      | Hs.714791        | NM_002228        | Jun proto-oncogene                                       |
| <i>KREMEN1</i>  | Hs.229335        | NM_001039570     | Kringle containing transmembrane protein 1               |
| <i>LEF1</i>     | Hs.555947        | NM_016269        | Lymphoid enhancer-binding factor 1                       |
| <i>LRP5</i>     | Hs.6347          | NM_002335        | Low density lipoprotein receptor-related protein 5       |
| <i>LRP6</i>     | Hs.584775        | NM_002336        | Low density lipoprotein receptor-related protein 6       |
| <i>MYC</i>      | Hs.202453        | NM_002467        | V-myc myelocytomatosis viral oncogene homolog (avian)    |
| <i>NKD1</i>     | Hs.592059        | NM_033119        | Naked cuticle homolog 1 (Drosophila)                     |
| <i>NLK</i>      | Hs.208759        | NM_016231        | Nemo-like kinase                                         |
| <i>PITX2</i>    | Hs.643588        | NM_000325        | Paired-like homeodomain 2                                |
| <i>PORCN</i>    | Hs.386453        | NM_022825        | Porcupine homolog (Drosophila)                           |
| <i>PPP2CA</i>   | Hs.483408        | NM_002715        | Protein phosphatase 2, catalytic subunit, alpha isozyme  |
| <i>PPP2R1A</i>  | Hs.467192        | NM_014225        | Protein phosphatase 2, regulatory subunit A, alpha       |
| <i>PYGO1</i>    | Hs.256587        | NM_015617        | Pygopus homolog 1 (Drosophila)                           |
| <i>RHOU</i>     | Hs.647774        | NM_021205        | Ras homolog gene family, member U                        |
| <i>SENP2</i>    | Hs.401388        | NM_021627        | SUMO1/sentrin/SMT3 specific peptidase 2                  |
| <i>SFRP1</i>    | Hs.713546        | NM_003012        | Secreted frizzled-related protein 1                      |
| <i>SFRP4</i>    | Hs.658169        | NM_003014        | Secreted frizzled-related protein 4                      |
| <i>FBXW4</i>    | Hs.500822        | NM_022039        | F-box and WD repeat domain containing 4                  |
| <i>SLC9A3R1</i> | Hs.728760        | NM_004252        | Solute carrier family 9 (sodium/hydrogen exchanger)      |
| <i>SOX17</i>    | Hs.98367         | NM_022454        | SRY (sex determining region Y)-box 17                    |
| <i>T</i>        | Hs.389457        | NM_003181        | T, brachyury homolog (mouse)                             |
| <i>TCF7</i>     | Hs.573153        | NM_003202        | Transcription factor 7 (T-cell specific, HMG-box)        |
| <i>TCF7L1</i>   | Hs.516297        | NM_031283        | Transcription factor 7-like 1 (T-cell specific, HMG-box) |
| <i>TLE1</i>     | Hs.197320        | NM_005077        | Transducin-like enhancer of split 1                      |
| <i>TLE2</i>     | Hs.332173        | NM_003260        | Transducin-like enhancer of split 2                      |
| <i>WIF1</i>     | Hs.284122        | NM_007191        | WNT inhibitory factor 1                                  |
| <i>WISP1</i>    | Hs.492974        | NM_003882        | WNT1 inducible signaling pathway protein 1               |
| <i>WNT1</i>     | Hs.248164        | NM_005430        | Wingless-type MMTV integration site family, member 1     |
| <i>WNT10A</i>   | Hs.121540        | NM_025216        | Wingless-type MMTV integration site family, member 10A   |
| <i>WNT11</i>    | Hs.108219        | NM_004626        | Wingless-type MMTV integration site family, member 11    |
| <i>WNT16</i>    | Hs.272375        | NM_057168        | Wingless-type MMTV integration site family, member 16    |
| <i>WNT2</i>     | Hs.567356        | NM_003391        | Wingless-type MMTV integration site family member 2      |
| <i>WNT2B</i>    | Hs.258575        | NM_004185        | Wingless-type MMTV integration site family, member 2B    |
| <i>WNT3</i>     | Hs.445884        | NM_030753        | Wingless-type MMTV integration site family, member 3     |
| <i>WNT3A</i>    | Hs.336930        | NM_033131        | Wingless-type MMTV integration site family, member 3A    |
| <i>WNT4</i>     | Hs.25766         | NM_030761        | Wingless-type MMTV integration site family, member 4     |
| <i>WNT5A</i>    | Hs.696364        | NM_003392        | Wingless-type MMTV integration site family, member 5A    |
| <i>WNT5B</i>    | Hs.306051        | NM_032642        | Wingless-type MMTV integration site family, member 5B    |
| <i>WNT6</i>     | Hs.29764         | NM_006522        | Wingless-type MMTV integration site family, member 6     |
| <i>WNT7A</i>    | Hs.72290         | NM_004625        | Wingless-type MMTV integration site family, member 7A    |
| <i>WNT7B</i>    | Hs.512714        | NM_058238        | Wingless-type MMTV integration site family, member 7B    |
| <i>WNT8A</i>    | Hs.591274        | NM_058244        | Wingless-type MMTV integration site family, member 8A    |
| <i>WNT9A</i>    | Hs.149504        | NM_003395        | Wingless-type MMTV integration site family, member 9A    |
| <b>RPL13A</b>   | <b>Hs.728776</b> | <b>NM_012423</b> | <b>Ribosomal protein L13a (Housekeeping gene)</b>        |
